# Supplementary material
Source: MDPI journal article supplement (https://www.mdpi.com/2073-4344/11/3/406)
Supplement: s1 [file s1]

## Attachment/SupportingInformation

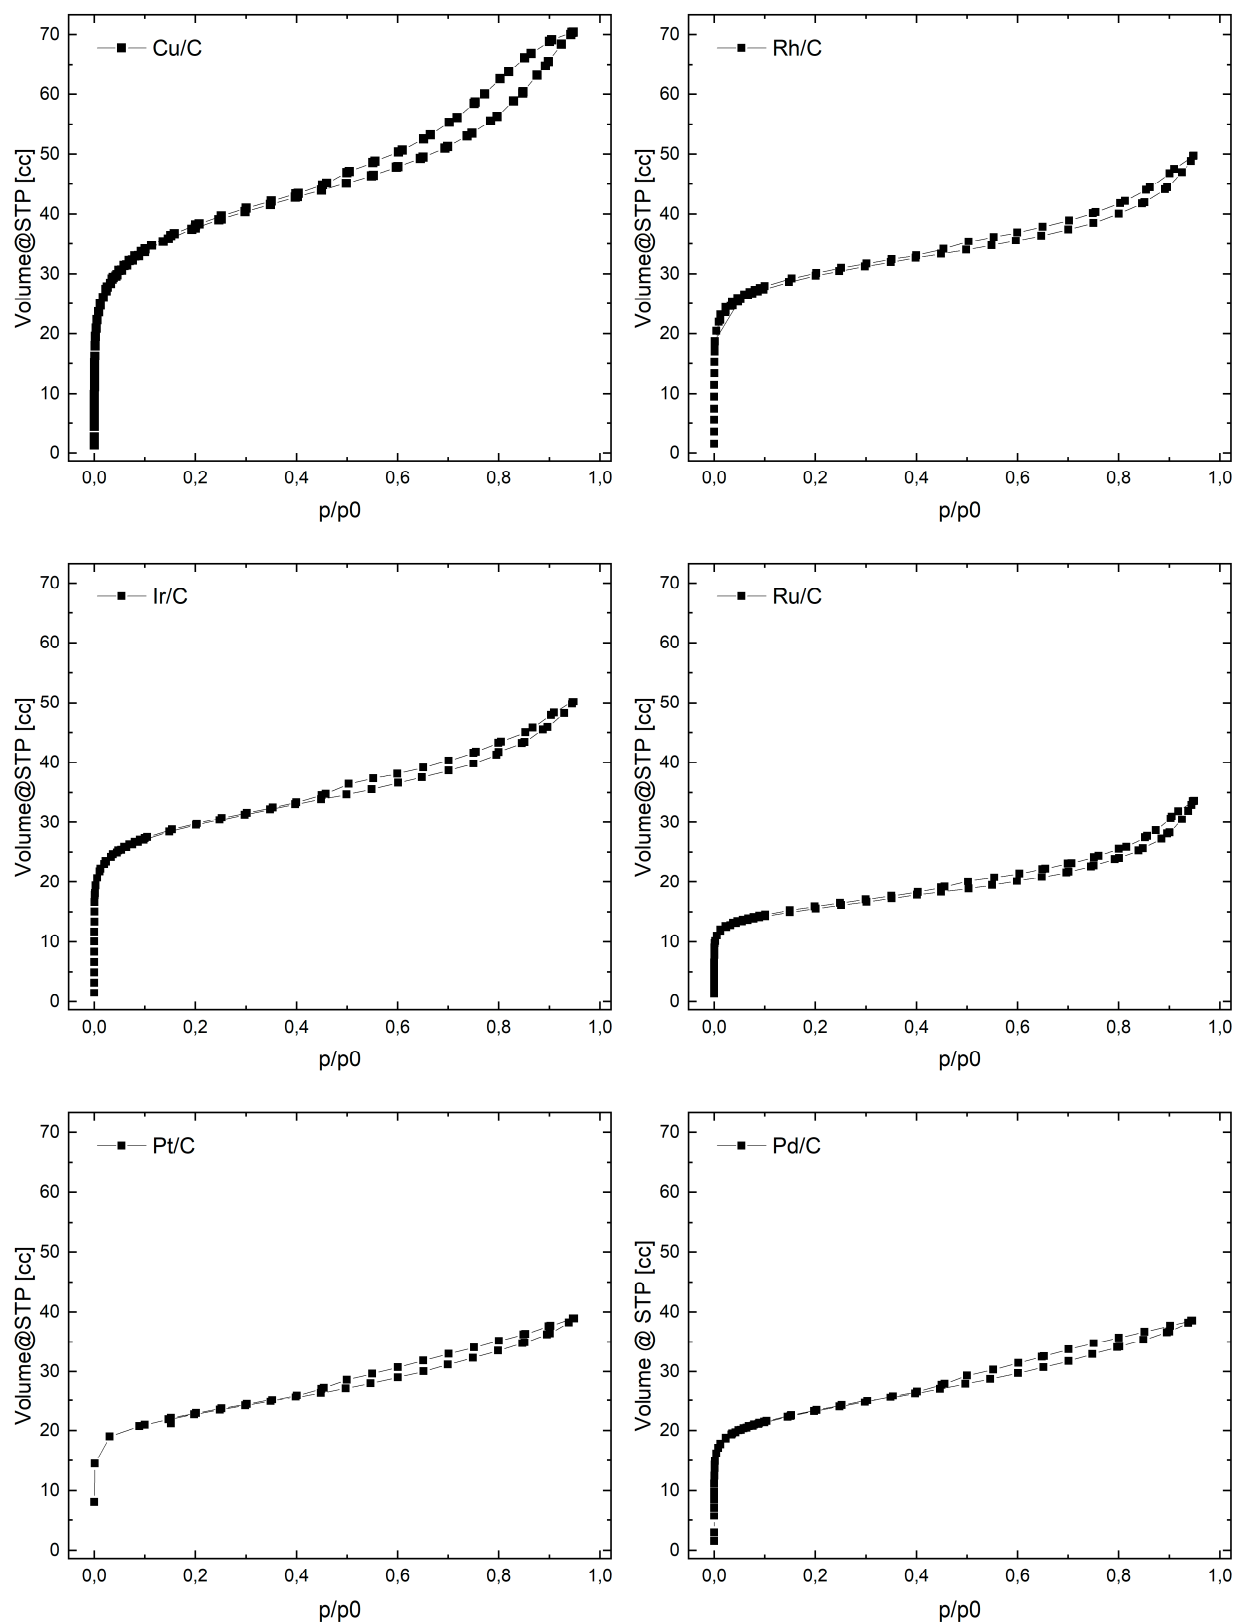

Figure S1. BET Isotherms for all tested Catalysts. Adsorption and desorption branch.

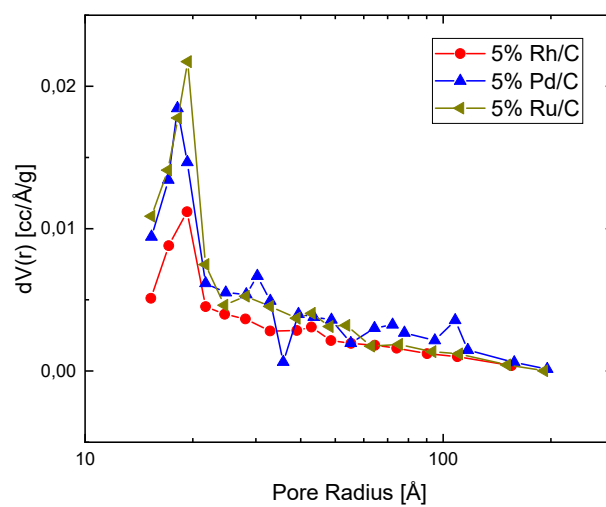

Figure S2. BJH pore size distributions of the used catalysts. Data for Pt/C, Ir/C and Cu/C was recently published in [1].

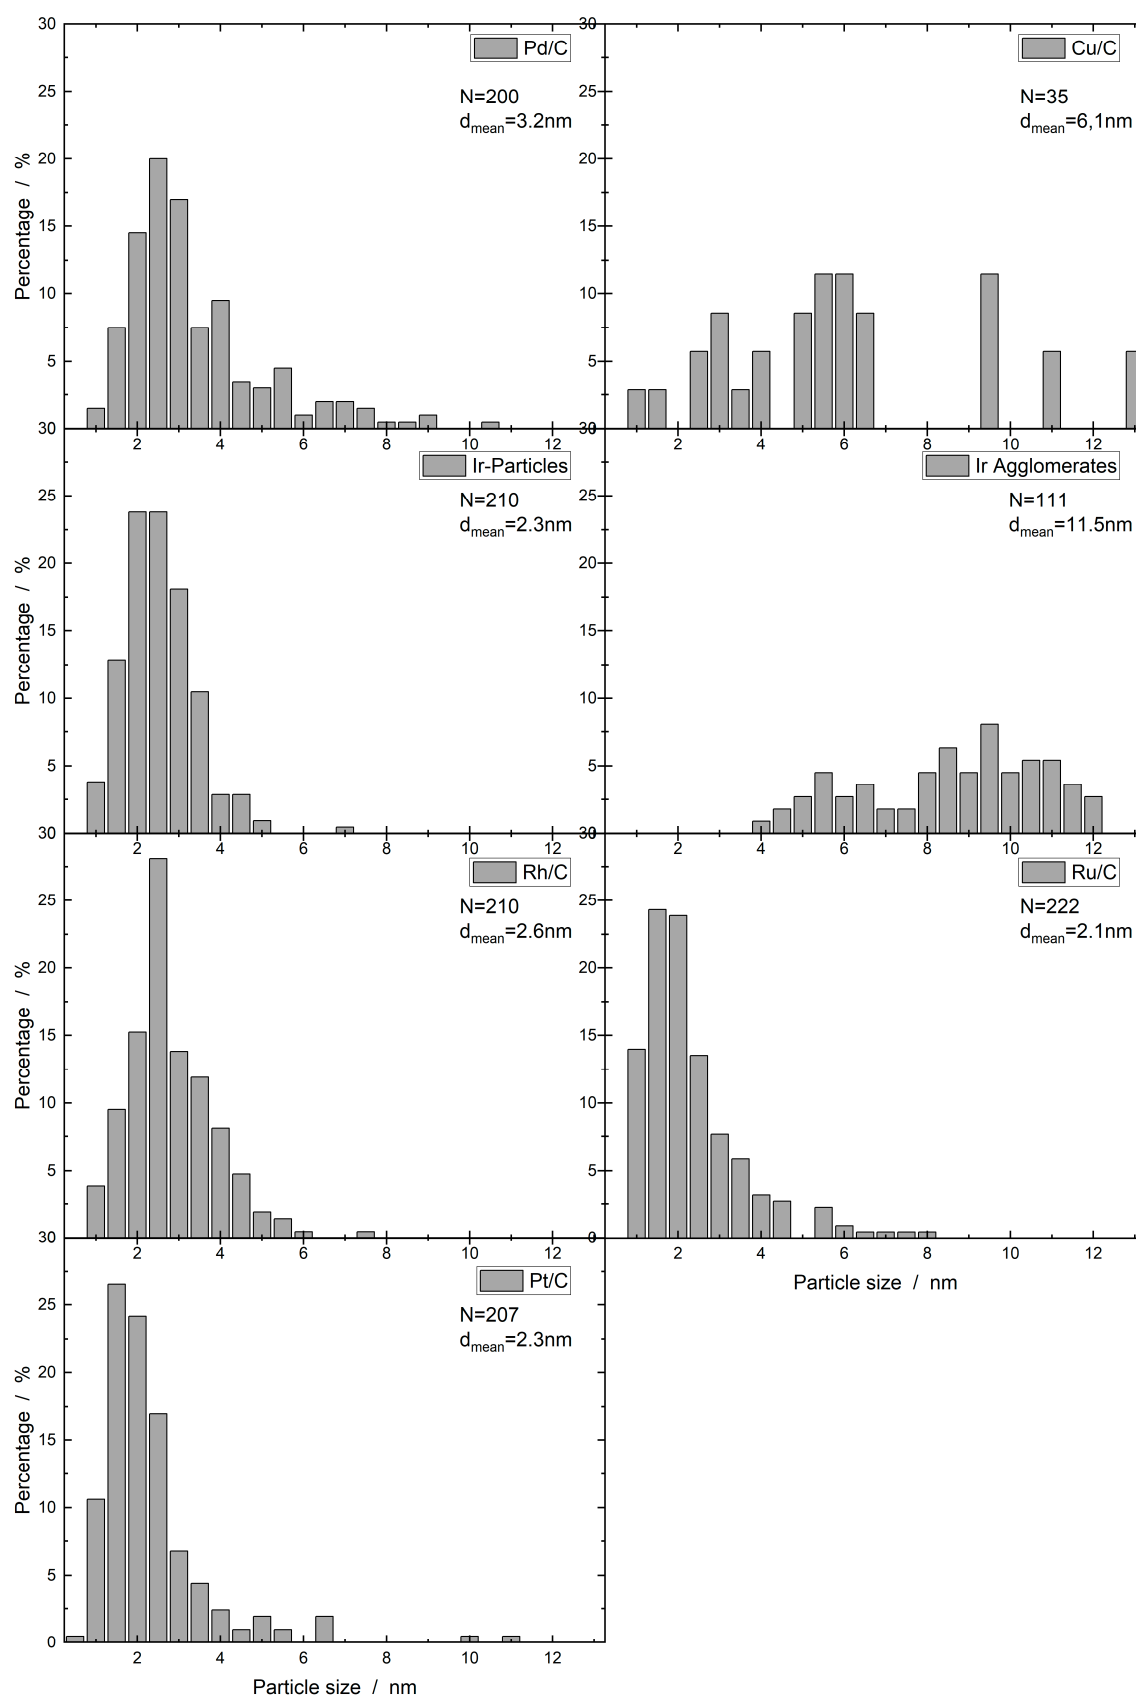

Figure S3. Particle size distribution, established by STEM.

## References

1. Pasel, J.; Häusler, J.; Schmitt, D.; Valencia, H.; Meledina, M.; Mayer, J.; Peters, R. Ethanol Dehydrogenation: A Reaction Path Study by Means of Temporal Analysis of Products. *Catalysts* **2020**, *10*, 1151, doi:10.3390/catal10101151.
